# Supplementary material
Source: HighWire-hosted journal article supplement (https://svn.smart01.highwire.org/content/1/3/108)
Supplement: inline-supplementary-material-1 [file inline-supplementary-material-1.pdf]

## ONLINE SUPPLEMENT

### **Taking Care of Volunteers in a Stroke Trial: A New Assisted-Management Strategy**

Amber C. Stuart, BA; Jason J. Sico, MD ; Catherine M. Viscoli, PhD; Ashis H. Tayal, MD; Silvio E. Inzucchi, MD; Gary A. Ford, FRCP; Karen L. Furie, MD; Robert Cote, MD, FRCPC; J. David Spence, MD; David Tanne, MD<sup>1</sup>; Walter N. Kernan, MD, on behalf of the IRIS Trial Investigators

#### **Supplemental Figures**

Figure 1. Annual Report to Participants (Letter)

Figure 2. Annual Report to Participants (Results)

Figure 3. Annual Cover Letter to HCPs

#### **Supplemental Methods**

The IRIS Trial Secondary Prevention Goals

#### **Supplemental Tables**

Table I. Baseline Characteristics of Study Cohort by Country

Table II. Number of Participants Known Alive with Missing Data – Overall and by Country

Table III. Achievement of Secondary Stroke Prevention Goals by Year – Overall and by Country

Table IV. Association Between Baseline Features and Achievement of Priority Prevention Goals from Baseline to Year 3

Table V. Treatment Effect According to Achievement of Priority Prevention Goals at Baseline

Table VI. Associations Between Enrollment Country and Achievement of Priority Prevention Goals from Baseline to Year 3

#### **References For The Online Supplement**

Figure 1. Annual Report to Participants (Letter)

DATE

PATIENT NAME

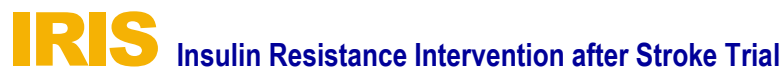

IRIS Site Name  
Site Address  
Site City, State Zip

PATIENT ADDRESS LINE 1

PATIENT ADDRESS LINE 2

CITY, STATE ZIP

IRIS ID#: XXX-XXX

Dear PATIENT NAME:

Thank you for participating in the IRIS trial. I am pleased to report that the trial is progressing very well. Over XXXX participants have been enrolled to date and all operations are running smoothly.

I am writing now with the results of your routine annual testing. We hope this information will help you and your health care provider to develop a plan to keep you healthy and reduce your risk for another stroke and heart disease.

The enclosed results were obtained at the time of your annual in-person interview. At that time, we asked you about risk factors for stroke, like cigarette smoking and heavy alcohol use. We also asked about your exercise habits and about any current treatments you were using to prevent another stroke. We measured your blood pressure and weight and tested your blood for evidence of high blood sugar, liver problems, high cholesterol and high triglycerides. The enclosed Annual Report shows your results, along with goals and recommendations to protect your health and help prevent another stroke or a heart attack.

At your request a copy of this letter has been sent to your personal health care provider. We encourage you to discuss this information with your health care provider, who can advise you if any additional action or testing is needed.

Thank you again for participating in this research. We are very grateful for your generous involvement in this international effort to improve the health of all patients after a stroke or transient ischemic attack (TIA). Your involvement will have a lasting impact on quality of care for thousands of other patients.

If you have any questions about the IRIS trial, please feel free to contact us.

Sincerely,

SITE PI NAME  
IRIS Principal Investigator

SITE COORDINATOR NAME  
Site Coordinator

CC: HCP NAME

Enc: 1) Annual Results, 2) "Staying Healthy after a Stroke or TIA", 3) "Keeping your Bones Healthy"

Figure 2. Annual Report to Participants (Results)

**PATIENT NAME**

**AGE:** XX **GENDER:** X **ID#:** XXX-XXX **ANNUAL VISIT:** XX/XX/XXXX **BLOOD TEST:** XX/XX/XXXX

| ITEM                                     | GOAL                                                                                                        | YOUR STATUS                                   | GOAL MET?*       |
|------------------------------------------|-------------------------------------------------------------------------------------------------------------|-----------------------------------------------|------------------|
| <b>Physical Measures</b>                 |                                                                                                             |                                               |                  |
| Blood pressure                           | Less than 140 / 90 mmHg                                                                                     | XXX/XX(X) mmHg                                | Yes/NO/Unk       |
| Weight                                   | XXX-XXX kgs                                                                                                 | XXX kgs                                       | Yes/NO/Unk       |
| Body mass index**                        | 18.0 to 25.0                                                                                                | XX                                            | Yes/NO/Unk       |
| <b>Blood Results</b>                     |                                                                                                             |                                               |                  |
| HDL ('good') cholesterol                 | At least 1.29 mmol/L (if male)***<br>At least 1.04 mmol/L (if female)***                                    | XX mmol/L                                     | Yes/NO/Unk       |
| LDL ('bad') cholesterol                  | Less than 2.59 mmol/L                                                                                       | XX(X) mmol/L                                  | Yes/NO/Unk       |
| Total cholesterol                        | Less than 5.18 mmol/L                                                                                       | XXX mmol/L                                    | Yes/NO/Unk       |
| Triglycerides                            | Less than 1.69 mmol/L                                                                                       | XXX mmol/L                                    | Yes/NO/Unk       |
| ALT                                      | 0-0.92 ukat/L (if male)<br>0-0.67 ukat/L (if female)                                                        | XX                                            | Yes/NO/Unk       |
| <b>Stroke Treatments</b>                 |                                                                                                             |                                               |                  |
| Anticoagulant (Coumadin)                 | Should be taken by most stroke or TIA patients who have atrial fibrillation (an irregular heart rhythm)**** | Taking/Not taking anticoagulant               | Yes/NO/Unk OR -- |
| Antiplatelet (Aspirin, Plavix, Aggrenox) | Taken if not on anticoagulants                                                                              | Taking antiplatelets/Not taking antiplatelets | Yes/NO/Unk       |
| <b>Health Habits</b>                     |                                                                                                             |                                               |                  |
| Cigarette smoking                        | No smoking                                                                                                  | Current smoker/Non-smoker                     | Yes/NO/Unk       |
| Alcohol use                              | Less than 3 drinks/day (if male)<br>Less than 2 drinks/day (if female)                                      | X.X drinks/day                                | Yes/NO/Unk       |
| Aerobic exercise                         | 3 days/week for total 20 minutes/day                                                                        | Yes/No                                        | Yes/NO/Unk       |
| Strength training                        | 2 days/week for 10 reps of 8 exercises                                                                      | Yes/No                                        | Yes/NO/Unk       |
| Calcium intake                           | 1200 mg/day from diet and/or supplements                                                                    | Taking/Not taking supplement                  | ?                |
| Vitamin D intake                         | 800 IUs/day from diet and/or supplements                                                                    | Taking/Not taking supplement                  | ?                |
| Bone density testing                     | Measured within past 5 years                                                                                | Yes/No                                        | Yes/NO/Unk       |

\*If 'NO'=item was not at goal when measured; 'Unk'=Unknown; '?'=Meeting goal depends on diet and/or supplement use.

\*\*Body mass index calculated as weight (kg) /height (m) <sup>2</sup>. It is a standard measure of weight adjusted for height.

\*\*\*For HDL, higher values are considered good and protect against vascular disease.

\*\*\*\*Whether or not goal is met for anticoagulation depends on presence or absence of atrial fibrillation.

**RECOMMENDATIONS** (recommendation listed ONLY if applicable to patient)

**BLOOD PRESSURE:** See your doctor within a few weeks for adjustment of your blood pressure medications. Your blood pressure was too high when we measured it.

**LIPID RESULTS:** Review the lipid results with your health care provider to consider changes in your cholesterol-lowering medication. Your LDL cholesterol may be too high (actual goals depend on your individual risk factors for heart disease and stroke).

**ANTIPLATELET USE:** Talk with your health care provider about taking aspirin or another antiplatelet medication. These medications may prevent future strokes in patients with a recent stroke or TIA.

**CIGARETTE SMOKING:** Do everything you can to stop smoking. You might ask your health care provider about medications to help you quit smoking. We have enclosed a brochure designed to help you stop smoking.

**BONE HEALTH:** Aim to get the recommended amounts of calcium & vitamin D through diet or supplements to reduce your risk of bone fracture. You can also strengthen your bones and protect blood vessels by regular exercise and avoiding excessive alcohol use.

The American Osteoporosis Foundation recommends bone mineral density testing for all men over age 69 and women over age 64.

Figure 3. Annual Cover Letter to HCPs

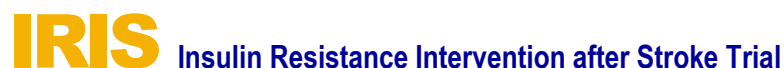

RIS Site Name  
Site Address  
Site City, State Zip

DATE

HCP NAME  
HCP ADDRESS1  
HCP ADDRESS2  
CITY, STATE ZIP

RE: PATIENT NAME  
DOB: XX/XX/XXXX  
IRIS ID#: XXX-XXX

Dear HCP NAME:

PATIENT NAME is enrolled in the Insulin Resistance Intervention after Stroke (IRIS) Trial, a randomized placebo-controlled clinical trial funded by the National Institutes of Health. The research objective for IRIS is to test the effectiveness of pioglitazone (Actos®) compared with placebo for prevention of recurrent stroke and myocardial infarction among non-diabetic patients with ischemic stroke or transient ischemic attack (TIA) and insulin resistance. The trial has enrolled XXXX participants from about 160 research centers throughout the world.

We are in frequent contact with each IRIS participant to monitor study endpoints, medication adherence and adverse events. Once a year, we complete a brief physical examination, repeat the ALT test, and measure vascular risk factors, including glucose and cholesterol.

We recently completed this testing for PATIENT NAME and have sent the participant a copy of the results. I am enclosing a copy of my letter. We have encouraged PATIENT NAME to contact you for any values that are indicated as not meeting the listed treatment goals. (In the IRIS protocol, patients remain under the care of their personal physician for all matters not directly related to the research intervention.)

If you have any questions, please call me.

Sincerely,

SITE PI NAME  
IRIS Principal Investigator

Enc. Letter to patient  
IRIS Brochure

### *The IRIS Trial Secondary Prevention Goals*

For lipid management, the IRIS goal for low-density lipoprotein (LDL) of less than 2.59 mmol/L was based on 2001 NCEP guidelines.<sup>1</sup> In 2008, the AHA revised its approach by recommending high-intensity statin therapy after atherosclerotic stroke or TIA in patients without known coronary heart disease (CHD).<sup>2</sup> Although statin therapy was not reported back to IRIS participants in their results letters, we describe statin use in this population in addition to achievement of LDL <2.59 mmol/L to reflect this revised approach.

For patients with ischemic stroke or TIA with atrial fibrillation, oral anticoagulation with vitamin K antagonists (VKA) was recommended at the time IRIS began enrolling<sup>3</sup> and remained the primary anticoagulation therapy for these patients until 2014 when the AHA allowed apixaban and dabigatran as Class I alternatives to VKA therapy.<sup>4</sup> IRIS participants were told that an anticoagulant is advisable for stroke or TIA patients with atrial fibrillation unless there is a contraindication.

In 2005 it was broadly recognized that all patients with non-cardioembolic stroke should receive aspirin monotherapy.<sup>3,5</sup> In 2008, the AHA revised its approach to allow clopidogrel monotherapy and the combination of aspirin and extended-release dipyridamole as Class I alternatives to aspirin monotherapy.<sup>2</sup> The IRIS trial anticipated these changes by advising any participant not taking an anticoagulant to take an antiplatelet agent such as aspirin, clopidogrel, or combined sustained-release dipyridamole-aspirin. IRIS participants were considered at goal for use of antithrombotic therapy if they were taking either an anticoagulant or an antiplatelet medication.

Guidelines for management of blood pressure, body weight, cigarette smoking, alcohol use, and aerobic exercise participation were unchanged during the trial. IRIS goals were defined as: blood pressure <140/90 mm Hg,<sup>3,6</sup> body mass index (BMI) 18-25 kg/m<sup>2</sup>,<sup>7</sup> abstinence from cigarette smoking,<sup>3</sup> safe alcohol use ( $\leq 2$  drinks/day for men and  $\leq 1$  drink/day for women),<sup>7</sup> and aerobic exercise [large-muscle activities (e.g., walking, treadmill, stationary cycle, combined arm-leg ergometry, arm ergometry, seated stepper)] at least three days/week for a minimum total of 20 minutes/day.<sup>8</sup>

**Table I. Baseline Characteristics of Study Cohort by Country\***

|                                                           | United States<br>n=2592 | Canada<br>n=543 | United Kingdom<br>n=256 | Israel<br>n=178 | Germany<br>n=151 |
|-----------------------------------------------------------|-------------------------|-----------------|-------------------------|-----------------|------------------|
| Demographic Features (%)                                  |                         |                 |                         |                 |                  |
| Age (years)                                               | 63.3±11                 | 64.6±10         | 64.5±11                 | 60.7±10         | 61.0±10          |
| Male                                                      | 63                      | 70              | 68                      | 74              | 72               |
| Black race                                                | 16                      | 2               | 2                       | 0               | 1                |
| Hispanic ethnicity                                        | 5                       | 1               | 3                       | 1               | 4                |
| College education ( <i>yrs&gt;12</i> )                    | 51                      | 34              | 76                      | 47              | 14               |
| Married/living with partner                               | 68                      | 75              | 71                      | 83              | 80               |
| Clinical History (%)†                                     |                         |                 |                         |                 |                  |
| Stroke at entry (vs. TIA)                                 | 89                      | 83              | 79                      | 90              | 88               |
| Hypertension                                              | 74                      | 64              | 61                      | 58              | 86               |
| Hyperlipidemia                                            | 70                      | 63              | 56                      | 71              | 71               |
| Coronary artery disease                                   | 13                      | 11              | 7                       | 9               | 7                |
| Atrial fibrillation                                       | 6                       | 7               | 11                      | 3               | 10               |
| Carotid artery disease                                    | 20                      | 20              | 16                      | 8               | 13               |
| Peripheral vascular disease                               | 6                       | 5               | 4                       | 4               | 5                |
| Current smoker                                            | 16                      | 15              | 13                      | 29              | 13               |
| Physical Examination                                      |                         |                 |                         |                 |                  |
| Body-mass index (kg/m <sup>2</sup> )                      | 30±6                    | 29±4            | 30±5                    | 28±4            | 29±4             |
| Waist (cms)                                               | 104±15                  | 102±13          | 104±15                  | 102±13          | 107±10           |
| Systolic blood pressure (mm Hg)                           | 133±18                  | 130±16          | 138±16                  | 134±17          | 136±17           |
| Diastolic blood pressure (mm Hg)                          | 79±11                   | 77±10           | 82±10                   | 83±9            | 84±10            |
| National Institutes of Health Stroke Scale (median [IQR]) | 0 (0,2)                 | 0 (0,1)         | 0 (0,1)                 | 0 (0,1)         | 0 (0,1)          |
| Modified Rankin (median [IQR])                            | 1 (0,2)                 | 1 (0,2)         | 1 (0,1)                 | 0 (0,1)         | 1 (0,1)          |
| Modified mini-mental exam (median [IQR])                  | 96 (92,99)              | 97 (93,99)      | 96 (94,99)              | 97 (93,99)      | 98 (95,100)      |
| Laboratory Data                                           |                         |                 |                         |                 |                  |
| Hemoglobin A <sub>1c</sub> (proportion of total)          | .058±.004               | .058±.004       | .057±.003               | .058±.005       | .056±.003        |
| Homeostasis assessment model (median [IQR])‡              | 4.7 (3.7,6.3)           | 4.4 (3.7,5.8)   | 5.0 (3.9,6.7)           | 4.5 (3.8,5.8)   | 4.8 (4.0,6.2)    |
| Low-density lipoprotein cholesterol (mmol/L)              | 2.33±0.80               | 1.99±0.83       | 2.15±0.78               | 2.51±0.75       | 2.38±0.73        |
| High-density lipoprotein cholesterol (mmol/L)             | 1.22±0.34               | 1.19±0.28       | 1.32±0.34               | 1.17±0.31       | 1.29±0.31        |
| Triglycerides (mmol/L)                                    | 1.64±0.87               | 1.54±0.64       | 1.49±0.80               | 1.55±0.80       | 1.47±0.79        |
| Concomitant Medications (%)                               |                         |                 |                         |                 |                  |
| Statin therapy                                            | 80                      | 88              | 91                      | 76              | 86               |
| Aspirin                                                   | 78                      | 71              | 40                      | 64              | 82               |
| Non-aspirin antiplatelet                                  | 42                      | 37              | 77                      | 39              | 22               |
| Oral anticoagulants                                       | 11                      | 11              | 11                      | 7               | 15               |
| Antithrombotics (any)                                     | 99                      | 99              | 99                      | 100             | 100              |

\*Plus-minus values means  $\pm$  SD. Features are presented as median values when distributions are highly skewed; medians are shown with values to describe dispersion (IQR=25th percentile, 75th percentile).

†Clinical history variables were defined as follows: stroke or TIA, see entry criteria; hypertension, self-report; hyperlipidemia, self-report; coronary artery disease, self-report history of myocardial infarction, coronary-artery bypass graft, or coronary stent insertion; congestive heart failure, self-report; atrial fibrillation, history of AF on baseline electrocardiogram as determined by site investigator; peripheral vascular disease, self-report; current smoking, self-report. (Uncertain self-report = 'no'.)

‡The homeostasis model assessment (HOMA) is an index of insulin resistance based on fasting insulin and glucose values. A HOMA over 3.0 was used to identify patients with insulin resistance in the IRIS trial.<sup>9</sup>



| Time Point                                                                                                                         |          | Pt. Alive | All Prevention Goals | All Priority Prevention Goals* | Physiological Goals |                    |                             | Drug Use Goals |                         | Behavioral Goals             |                   |                   |
|------------------------------------------------------------------------------------------------------------------------------------|----------|-----------|----------------------|--------------------------------|---------------------|--------------------|-----------------------------|----------------|-------------------------|------------------------------|-------------------|-------------------|
|                                                                                                                                    |          |           |                      |                                | BP <140/90 mm Hg    | LDL-c <2.59 mmol/L | BMI 18-25 kg/m <sup>2</sup> | Statin Therapy | Antithrombotic Therapy† | Cigarette Smoking Abstinence | Safe Alcohol Use‡ | Aerobic Exercise§ |
| UNITED STATES                                                                                                                      | Baseline | 2592      | 87                   | 41                             | 10                  | 31                 | 10                          | 8              | 0                       | 0                            | 20                | 19                |
|                                                                                                                                    | Year 1   | 2529      | 343                  | 322                            | 261                 | 298                | 206                         | 190            | 189                     | 176                          | 184               | 188               |
|                                                                                                                                    | Year 2   | 2455      | 532                  | 501                            | 422                 | 448                | 263                         | 256            | 250                     | 249                          | 256               | 258               |
|                                                                                                                                    | Year 3   | 2260      | 578                  | 552                            | 476                 | 481                | 291                         | 277            | 281                     | 265                          | 275               | 283               |
| CANADA                                                                                                                             | Baseline | 543       | 8                    | 5                              | 2                   | 2                  | 2                           | 2              | 1                       | 0                            | 2                 | 0                 |
|                                                                                                                                    | Year 1   | 537       | 55                   | 53                             | 32                  | 51                 | 25                          | 20             | 20                      | 22                           | 23                | 24                |
|                                                                                                                                    | Year 2   | 527       | 62                   | 59                             | 43                  | 53                 | 27                          | 20             | 20                      | 20                           | 22                | 20                |
|                                                                                                                                    | Year 3   | 495       | 74                   | 72                             | 54                  | 67                 | 31                          | 27             | 27                      | 27                           | 29                | 31                |
| UNITED KINGDOM                                                                                                                     | Baseline | 256       | 14                   | 3                              | 0                   | 3                  | 0                           | 0              | 0                       | 0                            | 11                | 0                 |
|                                                                                                                                    | Year 1   | 252       | 35                   | 21                             | 16                  | 20                 | 13                          | 14             | 14                      | 11                           | 21                | 16                |
|                                                                                                                                    | Year 2   | 243       | 34                   | 28                             | 21                  | 28                 | 19                          | 15             | 15                      | 14                           | 21                | 14                |
|                                                                                                                                    | Year 3   | 211       | 41                   | 33                             | 18                  | 31                 | 15                          | 12             | 12                      | 13                           | 16                | 14                |
| ISRAEL                                                                                                                             | Baseline | 178       | 3                    | 0                              | 0                   | 0                  | 0                           | 0              | 0                       | 0                            | 2                 | 1                 |
|                                                                                                                                    | Year 1   | 175       | 13                   | 8                              | 7                   | 8                  | 6                           | 8              | 5                       | 5                            | 7                 | 5                 |
|                                                                                                                                    | Year 2   | 174       | 13                   | 11                             | 10                  | 11                 | 9                           | 9              | 8                       | 8                            | 9                 | 8                 |
|                                                                                                                                    | Year 3   | 166       | 23                   | 19                             | 17                  | 19                 | 14                          | 13             | 13                      | 13                           | 15                | 14                |
| GERMANY                                                                                                                            | Baseline | 151       | 14                   | 2                              | 0                   | 2                  | 0                           | 0              | 0                       | 0                            | 8                 | 4                 |
|                                                                                                                                    | Year 1   | 146       | 14                   | 10                             | 6                   | 10                 | 3                           | 3              | 3                       | 3                            | 5                 | 5                 |
|                                                                                                                                    | Year 2   | 144       | 16                   | 13                             | 10                  | 13                 | 4                           | 3              | 2                       | 2                            | 5                 | 2                 |
|                                                                                                                                    | Year 3   | 123       | 26                   | 19                             | 14                  | 18                 | 9                           | 6              | 6                       | 5                            | 12                | 5                 |
| ALL                                                                                                                                | Baseline | 3718      | 126                  | 51                             | 12                  | 38                 | 12                          | 10             | 1                       | 0                            | 43                | 24                |
|                                                                                                                                    | Year 1   | 3639      | 460                  | 414                            | 322                 | 387                | 253                         | 235            | 231                     | 217                          | 240               | 238               |
|                                                                                                                                    | Year 2   | 3543      | 657                  | 612                            | 506                 | 553                | 322                         | 303            | 295                     | 293                          | 313               | 302               |
|                                                                                                                                    | Year 3   | 3255      | 742                  | 695                            | 579                 | 616                | 360                         | 335            | 339                     | 323                          | 347               | 347               |
| Abbreviations: BP, blood pressure; LDL-c, low-density lipoprotein cholesterol; BMI, body mass index.                               |          |           |                      |                                |                     |                    |                             |                |                         |                              |                   |                   |
| *See text for justification of priority prevention goals: BP <140/90 mm Hg, LDL-c <2.59 mmol/L, and use of antithrombotic therapy. |          |           |                      |                                |                     |                    |                             |                |                         |                              |                   |                   |
| †Antithrombotic therapy includes antiplatelet or anticoagulation therapies.                                                        |          |           |                      |                                |                     |                    |                             |                |                         |                              |                   |                   |
| ‡Safe alcohol use was defined as ≤2 drinks/day for males and ≤1 drink/day for females. <sup>7</sup>                                |          |           |                      |                                |                     |                    |                             |                |                         |                              |                   |                   |
| §Aerobic exercise was defined as large-muscle activities at least 3 days/week for a total of 20 minutes/day. <sup>8</sup>          |          |           |                      |                                |                     |                    |                             |                |                         |                              |                   |                   |

| Time Point                                                                                                                                                                                                                                                                                                                                                                                                                                                                                                                                                   |          | Pts.<br>Alive | % Meeting<br>All Goals | % Meeting<br>Priority<br>Prevention<br>Goals* | % Meeting Physiological Goals |                          |                                   | % Meeting Drug Use Goals |                            | % Meeting Behavioral Goals         |                         |                      |
|--------------------------------------------------------------------------------------------------------------------------------------------------------------------------------------------------------------------------------------------------------------------------------------------------------------------------------------------------------------------------------------------------------------------------------------------------------------------------------------------------------------------------------------------------------------|----------|---------------|------------------------|-----------------------------------------------|-------------------------------|--------------------------|-----------------------------------|--------------------------|----------------------------|------------------------------------|-------------------------|----------------------|
|                                                                                                                                                                                                                                                                                                                                                                                                                                                                                                                                                              |          |               |                        |                                               | BP<br><140/90<br>mm Hg        | LDL-c<br><2.59<br>mmol/L | BMI<br>18-25<br>kg/m <sup>2</sup> | Statin<br>Therapy        | Antithrombotic<br>Therapy† | Cigarette<br>Smoking<br>Abstinence | Safe<br>Alcohol<br>Use‡ | Aerobic<br>Exercise§ |
| UNITED STATES                                                                                                                                                                                                                                                                                                                                                                                                                                                                                                                                                | Baseline | 2592          | 3                      | 46                                            | 66                            | 68                       | 18                                | 81                       | 99                         | 84                                 | 94                      | 48                   |
|                                                                                                                                                                                                                                                                                                                                                                                                                                                                                                                                                              | Year 1   | 2529          | 4                      | 48                                            | 71                            | 66                       | 16                                | 77                       | 96                         | 83                                 | 95                      | 49                   |
|                                                                                                                                                                                                                                                                                                                                                                                                                                                                                                                                                              | Year 2   | 2455          | 3                      | 49                                            | 72                            | 68                       | 17                                | 77                       | 96                         | 84                                 | 95                      | 47                   |
|                                                                                                                                                                                                                                                                                                                                                                                                                                                                                                                                                              | Year 3   | 2260          | 3                      | 50                                            | 72                            | 67                       | 17                                | 77                       | 96                         | 84                                 | 95                      | 48                   |
| CANADA                                                                                                                                                                                                                                                                                                                                                                                                                                                                                                                                                       | Baseline | 543           | 4                      | 63                                            | 75                            | 81                       | 18                                | 88                       | 100                        | 85                                 | 91                      | 51                   |
|                                                                                                                                                                                                                                                                                                                                                                                                                                                                                                                                                              | Year 1   | 537           | 5                      | 64                                            | 77                            | 83                       | 19                                | 86                       | 98                         | 85                                 | 94                      | 54                   |
|                                                                                                                                                                                                                                                                                                                                                                                                                                                                                                                                                              | Year 2   | 527           | 6                      | 68                                            | 78                            | 85                       | 18                                | 87                       | 98                         | 85                                 | 93                      | 48                   |
|                                                                                                                                                                                                                                                                                                                                                                                                                                                                                                                                                              | Year 3   | 495           | 7                      | 65                                            | 77                            | 83                       | 19                                | 84                       | 98                         | 85                                 | 94                      | 49                   |
| UNITED KINGDOM                                                                                                                                                                                                                                                                                                                                                                                                                                                                                                                                               | Baseline | 256           | 3                      | 42                                            | 53                            | 77                       | 21                                | 91                       | 99                         | 87                                 | 88                      | 46                   |
|                                                                                                                                                                                                                                                                                                                                                                                                                                                                                                                                                              | Year 1   | 252           | 3                      | 47                                            | 62                            | 71                       | 21                                | 88                       | 100                        | 89                                 | 90                      | 38                   |
|                                                                                                                                                                                                                                                                                                                                                                                                                                                                                                                                                              | Year 2   | 243           | 5                      | 51                                            | 69                            | 74                       | 19                                | 88                       | 98                         | 90                                 | 91                      | 47                   |
|                                                                                                                                                                                                                                                                                                                                                                                                                                                                                                                                                              | Year 3   | 211           | 4                      | 53                                            | 74                            | 74                       | 23                                | 84                       | 96                         | 92                                 | 90                      | 46                   |
| ISRAEL                                                                                                                                                                                                                                                                                                                                                                                                                                                                                                                                                       | Baseline | 178           | 3                      | 37                                            | 61                            | 54                       | 26                                | 76                       | 100                        | 72                                 | 99                      | 52                   |
|                                                                                                                                                                                                                                                                                                                                                                                                                                                                                                                                                              | Year 1   | 175           | 2                      | 37                                            | 65                            | 55                       | 25                                | 77                       | 98                         | 72                                 | 100                     | 47                   |
|                                                                                                                                                                                                                                                                                                                                                                                                                                                                                                                                                              | Year 2   | 174           | 2                      | 40                                            | 64                            | 60                       | 22                                | 81                       | 97                         | 68                                 | 100                     | 43                   |
|                                                                                                                                                                                                                                                                                                                                                                                                                                                                                                                                                              | Year 3   | 166           | 3                      | 45                                            | 68                            | 61                       | 20                                | 78                       | 97                         | 70                                 | 98                      | 44                   |
| GERMANY                                                                                                                                                                                                                                                                                                                                                                                                                                                                                                                                                      | Baseline | 151           | 2                      | 39                                            | 61                            | 67                       | 17                                | 86                       | 100                        | 87                                 | 94                      | 43                   |
|                                                                                                                                                                                                                                                                                                                                                                                                                                                                                                                                                              | Year 1   | 146           | 0                      | 35                                            | 56                            | 61                       | 13                                | 83                       | 99                         | 87                                 | 92                      | 34                   |
|                                                                                                                                                                                                                                                                                                                                                                                                                                                                                                                                                              | Year 2   | 144           | 1                      | 36                                            | 59                            | 58                       | 18                                | 81                       | 99                         | 87                                 | 94                      | 31                   |
|                                                                                                                                                                                                                                                                                                                                                                                                                                                                                                                                                              | Year 3   | 123           | 2                      | 38                                            | 61                            | 60                       | 13                                | 75                       | 98                         | 86                                 | 97                      | 30                   |
| ALL                                                                                                                                                                                                                                                                                                                                                                                                                                                                                                                                                          | Baseline | 3720          | 3                      | 47                                            | 66                            | 70                       | 18                                | 83                       | 99                         | 84                                 | 93                      | 48                   |
|                                                                                                                                                                                                                                                                                                                                                                                                                                                                                                                                                              | Year 1   | 3639          | 4                      | 49                                            | 70                            | 68                       | 17                                | 79                       | 97                         | 84                                 | 94                      | 48                   |
|                                                                                                                                                                                                                                                                                                                                                                                                                                                                                                                                                              | Year 2   | 3543          | 4                      | 51                                            | 71                            | 70                       | 18                                | 80                       | 97                         | 84                                 | 95                      | 46                   |
|                                                                                                                                                                                                                                                                                                                                                                                                                                                                                                                                                              | Year 3   | 3255          | 4                      | 52                                            | 72                            | 70                       | 18                                | 78                       | 96                         | 84                                 | 95                      | 47                   |
| Abbreviations: BP, blood pressure; LDL-c, low-density lipoprotein cholesterol; BMI, body mass index.<br>*See text for justification of priority prevention goals: BP <140/90 mm Hg, LDL-c <2.59 mmol/L, and use of antithrombotic therapy.<br>†Antithrombotic therapy includes antiplatelet or anticoagulation therapies<br>‡Safe alcohol use was defined as ≤2 drinks/day for males and ≤1 drink/day for females. <sup>7</sup><br>§Aerobic exercise was defined as large-muscle activities at least 3 days/week for a total of 20 minutes/day. <sup>8</sup> |          |               |                        |                                               |                               |                          |                                   |                          |                            |                                    |                         |                      |

**Table IV. Associations between Baseline Features and Achievement of Priority Prevention Goals from Baseline to Year 3\***

| Baseline Feature             | Bivariate Analysis |         |                     |         |      |         | Adjusted Analysis† |        |
|------------------------------|--------------------|---------|---------------------|---------|------|---------|--------------------|--------|
|                              | Feature Present    |         | Feature Not Present |         | OR   | P       | OR                 | P      |
|                              | Pts.               | At Goal | Pts.                | At Goal |      |         |                    |        |
| Male sex                     | 678                | 56%     | 307                 | 46%     | 1.54 | 0.002   | 1.40               | 0.02   |
| White race                   | 846                | 56%     | 131                 | 36%     | 2.26 | <0.0001 | 1.71               | 0.01   |
| Hispanic ethnicity           | 25                 | 56%     | 956                 | 53%     | 1.13 | 0.76    |                    |        |
| Married/with partner         | 738                | 57%     | 244                 | 42%     | 1.79 | <0.0001 | 1.47               | 0.02   |
| High school graduate         | 768                | 56%     | 200                 | 45%     | 1.53 | 0.007   |                    |        |
| Index stroke (vs TIA)        | 848                | 53%     | 137                 | 53%     | 1.02 | 0.91    |                    |        |
| CAD history‡                 | 133                | 59%     | 852                 | 52%     | 1.30 | 0.16    |                    |        |
| Atrial fibrillation history§ | 59                 | 61%     | 926                 | 52%     | 1.42 | 0.2     |                    |        |
| PVD history                  | 54                 | 41%     | 931                 | 54%     | 0.59 | 0.06    |                    |        |
| Non-smoker                   | 844                | 55%     | 141                 | 42%     | 1.69 | 0.004   | 1.62               | 0.01   |
| Obese                        | 442                | 51%     | 543                 | 55%     | 0.84 | 0.19    |                    |        |
| Abdominal obesity            | 605                | 53%     | 377                 | 54%     | 0.94 | 0.64    |                    |        |
|                              | At Goal            |         | Not At Goal         |         |      |         |                    |        |
|                              | Mean (SD)          |         |                     |         |      |         |                    |        |
| Age, years                   | 63.0               | (10.4)  | 63.6                | (10.3)  | 0.94 | 0.37    |                    |        |
| 3MS score                    | 95.6               | (5.0)   | 94.0                | (6.7)   | 1.61 | <0.0001 | 1.55               | 0.0003 |
| Rankin score                 | 1.0                | (1.0)   | 0.9                 | (0.9)   | 1.06 | 0.38    |                    |        |
| NIH stroke scale             | 1.0                | (1.6)   | 0.9                 | (1.5)   | 1.03 | 0.45    |                    |        |

Abbreviations: OR, odds ratio; CAD, coronary artery disease; PVD, peripheral vascular disease.  
\*See text for justification of priority prevention goals: BP <140/90 mm Hg, LDL-c <2.59 mmol/L, and use of antithrombotic therapy. Comparison group is participants not at goal at any time from baseline to year 3.  
†Logistic model selected in stepwise procedure considering only significant features in bivariate analysis.  
‡CAD history was defined as self-reported history of myocardial infarction, CABG, or coronary stent insertion.  
§Considered uncertain atrial fibrillation history as absent.  
||OR for being at goal if feature present vs. absent for categorical features; OR for 10 unit change in age, 3MS score, and for 1 unit change in Rankin, NIHSS.

**Table V. Treatment Effect According to Achievement of Priority Prevention Goals at Baseline\***

| Achievement Status | Stroke or Myocardial Infarction<br><i>No. Participants (%)</i> |              |     |            | Hazard Ratio<br>(95% CI) | P Value† |
|--------------------|----------------------------------------------------------------|--------------|-----|------------|--------------------------|----------|
|                    | N                                                              | Pioglitazone | N   | Placebo    |                          |          |
| At goal            | 846                                                            | 67 (7.9)     | 884 | 96 (10.9)  | 0.71 (0.52, 0.97)        | 0.02     |
| Not at goal        | 989                                                            | 103 (10.4)   | 948 | 120 (12.7) | 0.82 (0.63, 1.07)        | 0.15     |

Abbreviations: CI, confidence interval.

\*See text for justification of priority prevention goals: BP <140/90 mm Hg, LDL-c <2.59 mmol/L, and use of antithrombotic therapy.

†P value from log-rank statistic using a type I error of 0.05 (2-sided), not adjusted for interim looks. P=0.49 for interaction.

| <b>Table VI.</b> Associations Between Enrollment Country and Achievement of Priority Prevention Goals from Baseline to year 3*                                                                                     |     |         |                    |         |                    |         |
|--------------------------------------------------------------------------------------------------------------------------------------------------------------------------------------------------------------------|-----|---------|--------------------|---------|--------------------|---------|
|                                                                                                                                                                                                                    |     |         | Bivariate Analysis |         | Adjusted Analysis‡ |         |
| Enrollment Country                                                                                                                                                                                                 | N   | At Goal | OR†                | P value | OR†                | P value |
| Canada                                                                                                                                                                                                             | 197 | 75%     | 3.45               | <0.0001 | 3.05               | <0.0001 |
| Germany                                                                                                                                                                                                            | 49  | 31%     | 0.37               | 0.002   | 0.34               | 0.0001  |
| Israel                                                                                                                                                                                                             | 60  | 35%     | 0.46               | 0.005   | 0.41               | 0.002   |
| UK                                                                                                                                                                                                                 | 51  | 39%     | 0.56               | 0.05    | 0.49               | 0.02    |
| US                                                                                                                                                                                                                 | 628 | 50%     | 0.76               | 0.04    | 0.89               | 0.39    |
| Abbreviations: OR, odds ratio.                                                                                                                                                                                     |     |         |                    |         |                    |         |
| *See text for justification of priority prevention goals: BP <140/90 mm Hg, LDL-c <100 mg/dL, and use of antithrombotic therapy. Comparison group is participants not at goal at any time from baseline to year 3. |     |         |                    |         |                    |         |
| †OR for being at goal if enrolled from specified country vs enrolled from another country.                                                                                                                         |     |         |                    |         |                    |         |
| ‡Logistic model adjusted for male sex, white race, marital status (married/with partner vs not), smoking status (non-smoker vs smoker) and baseline 3MS score.                                                     |     |         |                    |         |                    |         |

## References

1. Expert Panel on Detection E, Treatment of High Blood Cholesterol in A. Executive Summary of The Third Report of The National Cholesterol Education Program (NCEP) Expert Panel on Detection, Evaluation, And Treatment of High Blood Cholesterol In Adults (Adult Treatment Panel III). *JAMA* 2001; **285**(19): 2486-97.
2. Adams RJ, Albers G, Alberts MJ, et al. Update to the AHA/ASA recommendations for the prevention of stroke in patients with stroke and transient ischemic attack. *Stroke* 2008; **39**(5): 1647-52.
3. Wolf PA, Clagett GP, Easton JD, et al. Preventing ischemic stroke in patients with prior stroke and transient ischemic attack : a statement for healthcare professionals from the Stroke Council of the American Heart Association. *Stroke* 1999; **30**(9): 1991-4.
4. Kernan WN, Ovbiagele B, Black HR, et al. Guidelines for the prevention of stroke in patients with stroke and transient ischemic attack: a guideline for healthcare professionals from the American Heart Association/American Stroke Association. *Stroke* 2014; **45**(7): 2160-236.
5. Hennekens CH, Dyken ML, Fuster V. Aspirin as a therapeutic agent in cardiovascular disease: a statement for healthcare professionals from the American Heart Association. *Circulation* 1997; **96**(8): 2751-3.
6. Chobanian AV, Bakris GL, Black HR, et al. The Seventh Report of the Joint National Committee on Prevention, Detection, Evaluation, and Treatment of High Blood Pressure: the JNC 7 report. *JAMA* 2003; **289**(19): 2560-72.
7. Krauss RM, Eckel RH, Howard B, et al. AHA Dietary Guidelines: revision 2000: A statement for healthcare professionals from the Nutrition Committee of the American Heart Association. *Stroke* 2000; **31**(11): 2751-66.
8. Gordon NF, Gulanick M, Costa F, et al. Physical activity and exercise recommendations for stroke survivors: an American Heart Association scientific statement from the Council on Clinical Cardiology, Subcommittee on Exercise, Cardiac Rehabilitation, and Prevention; the Council on Cardiovascular Nursing; the Council on Nutrition, Physical Activity, and Metabolism; and the Stroke Council. *Circulation* 2004; **109**(16): 2031-41.
9. Viscoli CM, Brass LM, Carolei A, et al. Pioglitazone for secondary prevention after ischemic stroke and transient ischemic attack: rationale and design of the Insulin Resistance Intervention after Stroke Trial. *Am Heart J* 2014; **168**(6): 823-9 e6.
